# Supplementary material
Source: PubMed Central journal article supplement (PMC9340000)
Supplement: bjsports-2021-104644supp003.pdf [file bjsports-2021-104644supp003.pdf]

| Chest Pain<br>(n=29)                                                                                                                                                                                                                | SOB<br>(n=52)                                                                                                                                                                                                                        | Exercise Intolerance<br>(n=16)                                                                                                                                                   | Palpitations/<br>Pre-syncope (n=5)                                                                       | Multiple Symptoms<br>w/ Chest Pain (n=20)                                                                                                                                                           | Multiple Symptoms<br>w/o Chest Pain (n=15)                                                                                                                    |
|-------------------------------------------------------------------------------------------------------------------------------------------------------------------------------------------------------------------------------------|--------------------------------------------------------------------------------------------------------------------------------------------------------------------------------------------------------------------------------------|----------------------------------------------------------------------------------------------------------------------------------------------------------------------------------|----------------------------------------------------------------------------------------------------------|-----------------------------------------------------------------------------------------------------------------------------------------------------------------------------------------------------|---------------------------------------------------------------------------------------------------------------------------------------------------------------|
| <u>Baseline Screening Protocol</u>                                                                                                                                                                                                  | <u>Baseline Screening Protocol</u>                                                                                                                                                                                                   | <u>Baseline Screening Protocol</u>                                                                                                                                               | <u>Baseline Screening Protocol</u>                                                                       | <u>Baseline Screening Protocol</u>                                                                                                                                                                  | <u>Baseline Screening Protocol</u>                                                                                                                            |
| ECG, Troponin, TTE (17)<br>ECG only (4)<br>ECG, Troponin, TTE, CBC,<br>CMP, PFTs (4)<br>ECG, Cardiac Stress Test (1)<br>ECG, Troponin, TTE, CMR (1)<br>ECG, Troponin, TTE,<br>CRP/BNP (1)<br>ECG, TTE (1)                           | ECG, Troponin, TTE (28)<br>ECG, Troponin, TTE,<br>CRP/BNP (8)<br>ECG, troponin, CMR (4)<br>ECG only (3)<br>ECG, Troponin, TTE, CMR (2)<br>ECG, Troponin, TTE, CBC,<br>CMP, PFTs (2)<br>ECG, TTE (2)<br>PFTs (2)<br>ECG, troponin (1) | ECG, Troponin, TTE (6)<br>ECG, Troponin, TTE, CBC,<br>CMP, PFTs (3)<br>ECG only (2)<br>ECG, Troponin, TTE,<br>Cardiac Stress Test (2)<br>None (2)<br>ECG, Troponin, TTE, CMR (1) | ECG, Troponin, TTE (2)<br>ECG, Troponin (1)<br>ECG, Troponin, TTE, CBC,<br>CMP, PFTs (1)<br>ECG, TTE (1) | ECG, Troponin, TTE (12)<br>None (3)<br>ECG only (1)<br>ECG, Troponin, TTE, CMR (2)<br>ECG, Troponin (1)<br>ECG, Troponin, TTE,<br>CRP (1)                                                           | ECG, Troponin, TTE (8)<br>ECG, Troponin, TTE, CBC,<br>CMP, PFTs (2)<br>None (3)<br>ECG, Troponin, CBC, CMP,<br>PFTs (1)<br>ECG, Troponin, TTE,<br>CRP/BNP (1) |
| <u>Additional Testing</u>                                                                                                                                                                                                           | <u>Additional Testing</u>                                                                                                                                                                                                            | <u>Additional Testing</u>                                                                                                                                                        | <u>Additional Testing</u>                                                                                | <u>Additional Testing</u>                                                                                                                                                                           | <u>Additional Testing</u>                                                                                                                                     |
| CMR (10)<br>ECG- Repeat (7)<br>TTE- Repeat (5)<br>CXR (3)<br>Holter/Event Monitor (3)<br>Cardiac Stress Test (3)<br>TTE- Initial (2)<br>Labs Other (2)<br>Troponin- Repeat (2)<br>CT-PE (1)<br>D-dimer (1)<br>Troponin- Initial (1) | CMR (7)<br>CT-PE (3)<br>D-dimer (3)<br>CXR (3)<br>TTE- Initial (4)<br>CPET (2)<br>ECG- Repeat (2)<br>Troponin- Initial (2)<br>Troponin- Repeat (2)<br>TTE- Repeat (1)<br>Cardiac Stress Test (1)<br>Labs Other (1)                   | TTE- Initial (2)<br>CXR (2)<br>CMR (1)<br>ECG- Initial (1)<br>Troponin- Initial (1)                                                                                              | CMR (1)<br>ECG- Repeat (1)<br>TTE- Repeat (1)                                                            | CMR (11)<br>Troponin- Initial (3)<br>TTE- Initial (3)<br>Cardiac Stress Test (3)<br>PFTs (3)<br>ECG- Initial (2)<br>CT-PE (2)<br>CXR (2)<br>Coronary CTA (1)<br>D-dimer (1)<br>Troponin- Repeat (1) | CMR (4)<br>Troponin- Initial (2)<br>ECG- Initial (2)<br>Holter/Event Monitor (2)<br>PFTs (1)                                                                  |
| <b>Definite- Myopericardial (1)</b><br><b>Definite- Pericardial (2)</b><br><b>Probable- Myopericardial (1)</b><br><b>POTS (1)</b>                                                                                                   | <b>Pneumonia (2)</b><br><b>Large Pleural Effusion (1)</b>                                                                                                                                                                            | <b>No New Diagnoses</b>                                                                                                                                                          | <b>No New Diagnoses</b>                                                                                  | <b>Definite- Pericardial (1)</b>                                                                                                                                                                    | <b>Inappropriate Sinus Tach (2)</b><br><b>POTS (1)</b>                                                                                                        |
